# Genetic Framework for Flattened Leaf Blade Formation in Unifacial Leaves of *Juncus prismatocarpus*

Takahiro Yamaguchi,<sup>a,1</sup> Satoshi Yano,<sup>a</sup> and Hirokazu Tsukaya<sup>a,b</sup>

<sup>a</sup>National Institute for Basic Biology, Okazaki, Aichi, 444-8585 Japan

<sup>b</sup>Graduate School of Science, University of Tokyo, Bunkyo-ku, Tokyo, 113-0033 Japan

Angiosperm leaves generally develop as bifacial structures with distinct adaxial and abaxial identities. However, several monocot species, such as iris and leek, develop unifacial leaves, in which leaf blades have only abaxial identity. In bifacial leaves, adaxial-abaxial polarity is required for leaf blade flattening, whereas many unifacial leaves become flattened despite their leaf blades being abaxialized. Here, we investigate the mechanisms underlying the development and evolution of flattened leaf blades in unifacial leaves. We demonstrate that the unifacial leaf blade is abaxialized at the gene expression level and that an ortholog of the *DROOPING LEAF (DL)* gene may promote flattening of the unifacial leaf blade. In two closely related *Juncus* species, *Juncus prismatocarpus*, which has flattened unifacial leaves, and *Juncus wallichianus*, which has cylindrical unifacial leaves, *DL* expression levels and patterns correlate with the degree of laminar outgrowth. Genetic and expression studies using interspecific hybrids of the two species reveal that the *DL* locus from *J. prismatocarpus* flattens the unifacial leaf blade and expresses higher amounts of *DL* transcript than does that from *J. wallichianus*. We also show that leaf blade flattening is a trigger for central-marginal leaf polarity differentiation. We suggest that flattened unifacial leaf blades may have evolved via the recruitment of *DL* function, which plays a similar cellular but distinct phenotypic role in monocot bifacial leaves.

## INTRODUCTION

A key question in biology is how diversity in organismal morphology arises and becomes established through evolution. Leaves of angiosperms exhibit considerable morphological diversity and thus represent an attractive subject for evolutionary developmental studies (Piazza et al., 2005). The diverse leaf forms in angiosperms can be categorized as bifacial or unifacial. Bifacial leaves, such as those of *Arabidopsis thaliana*, snapdragon (*Antirrhinum majus*), and maize (*Zea mays*), are the more typical form of leaves that differentiate adaxial-abaxial (upper-lower) polarity with respect to the position of the shoot apical meristem (SAM) (Figures 1A and 1D). The adaxial domain of a leaf primordium is adjacent to the SAM and differentiates into the upper side of the leaf, whereas the abaxial domain is away from the SAM and differentiates into the lower side of the leaf (Steeves and Sussex, 1989). The establishment of adaxial-abaxial polarity in bifacial leaves is regulated by overlapping and antagonistic genetic interactions involving several distinct transcription factors and small regulatory RNAs (Husbands et al., 2009). In both eudicots and monocots, these include members of the *Class III*

*Homeodomain Leucine Zipper (HD-ZIP III)* gene family (McConnell et al., 2001; Juarez et al., 2004; Itoh et al., 2008b), which specify adaxial identity and are expressed in the adaxial domain of leaves, and *KANADI* (Eshed et al., 2001; Kerstetter et al., 2001; Candela et al., 2008; Zhang et al., 2009) and *AUXIN RESPONSE FACTOR3 (ARF3)/ETTIN (ETT)* genes (Pekker et al., 2005; Itoh et al., 2008a), which are expressed abaxially, where they specify abaxial identity.

On the other hand, unifacial leaves, which are characterized by an abaxialized leaf blade, have repeatedly evolved in a number of divergent monocot species, from early-divergent (e.g., Acoraceae) to specialized families (e.g., Iridaceae, Alliaceae, and Juncaceae) (Kaplan, 1975; Rudall and Buzgo, 2002; Yamaguchi and Tsukaya, 2010). Monocot leaves usually consist of two distinct domains along the proximal-distal axis: the proximal leaf sheath and the distal leaf blade (Kaplan, 1973). In bifacial leaves, both domains are dorsoventrally flattened and differentiate with adaxial-abaxial polarity. By contrast, the transverse shape of the unifacial leaf blade is a bilaterally symmetric, flattened structure (ensiform) (Figures 1B and 1F) or a radially symmetric structure (cylindrical/terete) (Figures 1C and 1G) with only abaxial identity, while the leaf sheath has a similar structure to that of bifacial leaves, with morphological differentiation of adaxial-abaxial polarity (Kaplan, 1975; Yamaguchi and Tsukaya, 2010). The abaxialized property of the unifacial leaf blade has been ascertained through histological analysis of morphological features. For example, in the unifacial leaf blade, epidermal and mesophyll tissues usually show only abaxial characteristics, and vascular bundles are usually arranged in a ring beneath the outer leaf surface with all of the xylem poles pointing to the center (Kaplan, 1975).

<sup>1</sup> Address correspondence to tyama@nibb.ac.jp.

The authors responsible for distribution of materials integral to the findings presented in this article in accordance with the policy described in the Instructions for Authors (www.plantcell.org) are: Takahiro Yamaguchi (tyama@nibb.ac.jp) and Hirokazu Tsukaya (tsukaya@biol.s.u-tokyo.ac.jp).

 Some figures in this article are displayed in color online but in black and white in the print edition.

 Online version contains Web-only data.

 Open Access articles can be viewed online without a subscription. www.plantcell.org/cgi/doi/10.1105/tpc.110.076927

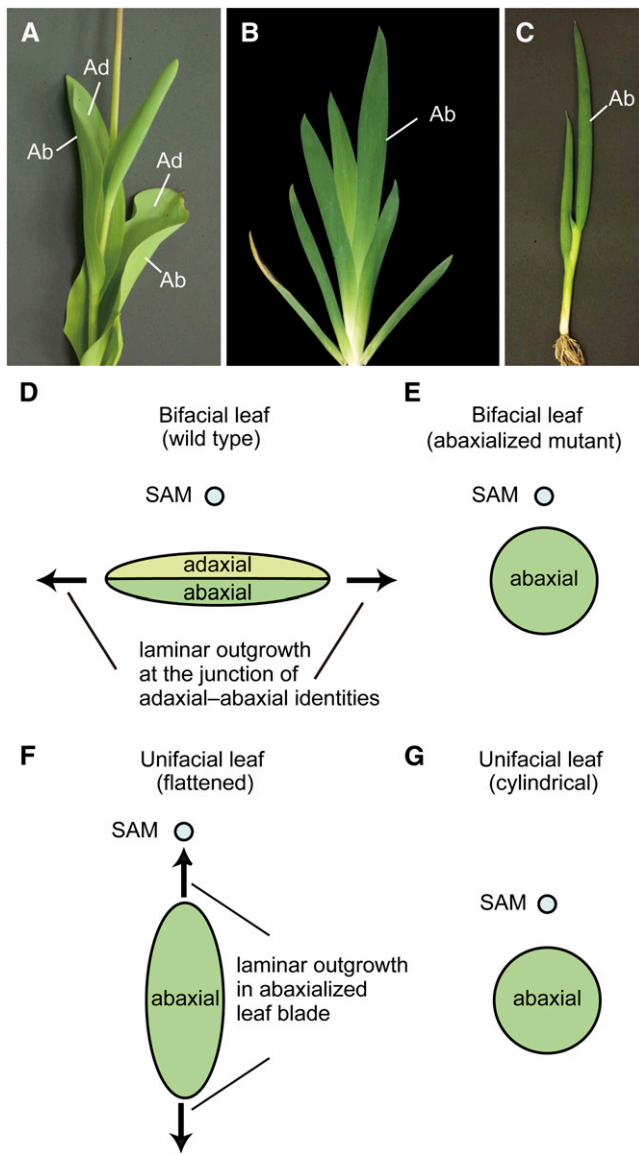

**Figure 1.** Leaf Blade Structures and Mechanisms of Laminar Outgrowth in Bifacial and Unifacial Leaves.

- (A) Bifacial leaves in tulip (*Tulipa gesneriana*). Ad, adaxial; Ab, abaxial.  
 (B) Flattened unifacial leaves in German iris (*Iris germanica*).  
 (C) Cylindrical unifacial leaves in Welsh onion (*Allium fistulosum*).  
 (D) to (G) Schematic diagrams showing transverse sections through leaf blades and mechanisms of laminar outgrowth. Positional relationships of leaves to the SAM are indicated by circles.  
 (D) Bifacial leaf blade.  
 (E) Radialized leaf blade in abaxialized mutants.  
 (F) Bilaterally symmetric, flattened unifacial leaf blade.  
 (G) Cylindrical unifacial leaf blade.

In both bifacial and unifacial leaves, flattening is an essential feature that optimizes light absorbance. In bifacial leaves, the establishment of adaxial-abaxial polarity is necessary for leaf blade flattening because laminar outgrowth is promoted at the juxtaposition of adaxial and abaxial identities (Figure 1D) (Waites

and Hudson, 1995). Thus, mutants or transgenic plants that have lost adaxial-abaxial polarity develop radialized leaf blades (Figure 1E). Therefore, it is interesting that many unifacial-leaved species develop flattened leaf blades, although their leaf blades lack adaxial-abaxial polarity (Figure 1F), yet some other species develop cylindrical leaf blades, which are similar to those of abaxialized mutants in bifacial-leaved species (Figure 1G) (Rudall and Buzgo, 2002; Yamaguchi and Tsukaya, 2010). This indicates that flattened leaves have independently evolved in bifacial and unifacial leaves, and flattened leaf blade formation in unifacial leaves is regulated by unknown mechanisms that differ from those in bifacial leaves.

The development and evolution of unifacial leaves have long been subjects of debate, and considerable histological studies have been conducted (reviewed in Kaplan, 1975). However, it remains largely unknown how unifacial leaf blades become abaxialized, how and why they have repeatedly evolved in monocots, and how abaxialized leaf blades become flattened in unifacial leaves. A crucial factor hindering progress in this area has been the lack of a suitable model research system. To answer these questions, we sought to unravel the genetic basis of unifacial leaf development, focusing on the genus *Juncus* (Juncaceae) as a model. *Juncus* contains species with a wide variety of leaf forms (Cutler, 1969; Kirschner, 2002a, 2002b) and is amenable to molecular genetic studies (Yamaguchi and Tsukaya, 2010).

In this study, we investigated the mechanisms underlying development and evolution of flattened leaf blades in unifacial leaves using two *Juncus* species: *Juncus prismatocarpus*, which has flattened unifacial leaves, and *Juncus wallichianus*, which has cylindrical unifacial leaves. We demonstrate that the unifacial leaf blade is abaxialized at the gene expression level and identify an ortholog of the *DROOPING LEAF (DL)* gene (Yamaguchi et al., 2004) as a strong candidate promoting flattened leaf blade formation in unifacial leaves. Our study also provides insight into the mechanisms that regulate the specification of central-marginal leaf polarity. Based on our results, we propose a genetic framework of flattened leaf blade formation in unifacial leaves and discuss the mechanisms underlying the evolution of flattened leaf blades in unifacial leaves.

## RESULTS

### Adaxial-Abaxial Identities in Unifacial Leaves

*J. prismatocarpus* develops typical unifacial leaves, with bilaterally symmetric flattened unifacial leaf blades and dorsoventrally flattened bifacial leaf sheaths (Figures 2A to 2D). To confirm the adaxial-abaxial identities in unifacial leaves, we first studied the expression patterns of the *HD-ZIPIII* (McConnell et al., 2001) and *ARF3/ETT* (Pekker et al., 2005) gene homologs (for their phylogenies, see Supplemental Figures 1 and 2 and Supplemental Data Sets 1 and 2 online), as they function in adaxial and abaxial domains of monocot (maize and rice [*Oryza sativa*]) leaves, respectively (Juarez et al., 2004; Itoh et al., 2008a, 2008b). In the leaf sheath of *J. prismatocarpus*, an *HD-ZIPIII* homolog (Jp *PHB*) was specifically expressed in the adaxial leaf surface and in

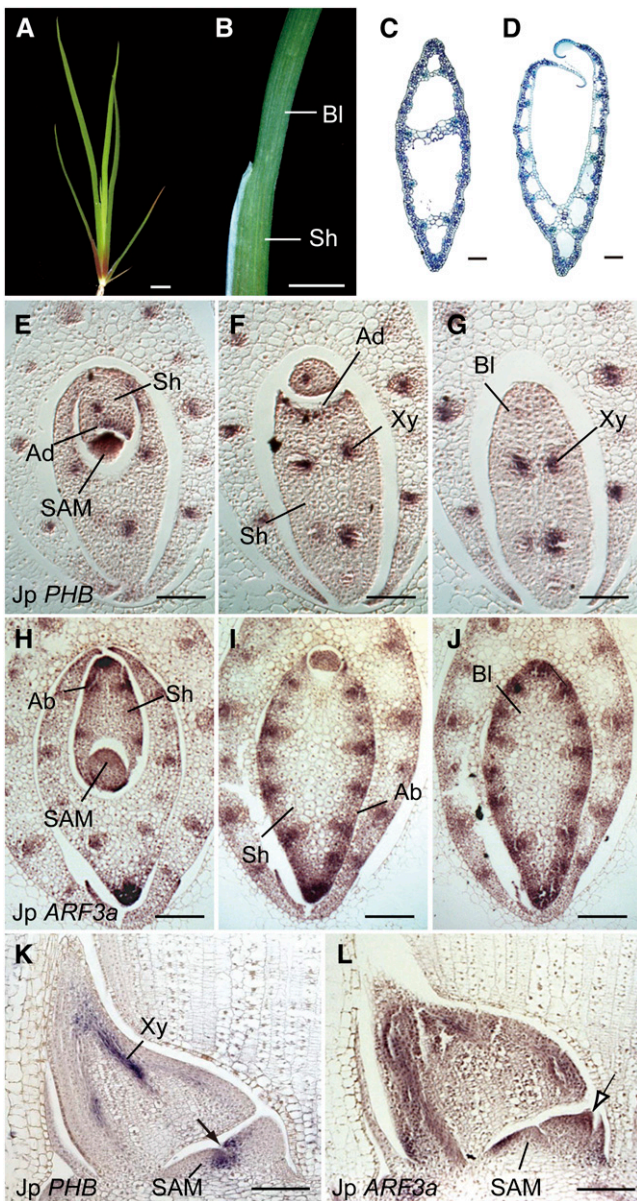

**Figure 2.** Adaxial-Abaxial Identities in Unifacial Leaves of *J. prismatocarpus*.

(A) Seedling of *J. prismatocarpus* 4 weeks after germination. (B) Lateral view of a *J. prismatocarpus* leaf. (C) and (D) Transverse sections of leaf blade (C) and leaf sheath (D) of *J. prismatocarpus*. The top of the image is the side facing the SAM. (E) to (G) In situ localization of Jp *PHB* transcripts in transverse sections of *J. prismatocarpus* leaf primordia. (H) to (J) In situ localization of Jp *ARF3a* transcripts in transverse sections of *J. prismatocarpus* leaf primordia. Sections are through the SAM [(E) and (H)], the leaf sheath [(F) and (I)], and the leaf blade [(G) and (J)]. (K) and (L) In situ localization of Jp *PHB* (K) and Jp *ARF3a* (L) transcripts in longitudinal sections through the SAM. Arrow in (K) shows the adaxial expression of Jp *PHB* only in the basal region of the leaf primordium, which will differentiate into the leaf sheath. The outlined arrow in (L) shows expression of Jp *ARF3a* throughout the distal region of the leaf primordium, which will differentiate into the leaf blade.

the presumptive xylem region of procambial strands (Figures 2E and 2F), whereas an *ARF3* homolog (Jp *ARF3a*) was specifically expressed in the abaxial domain (Figures 2H and 2I). Thus, these genes could be molecular markers of adaxial-abaxial identities in *J. prismatocarpus* as well as maize and rice. By contrast, in the leaf blade, the expression of Jp *PHB* was restricted to the presumptive xylem region (Figures 2G and 2K), whereas Jp *ARF3a* was expressed throughout the entire outer region of the leaf blade (Figures 2J and 2L). Thus, the leaf blade of *J. prismatocarpus* is indeed abaxialized at the gene expression level.

To understand the mechanisms underlying the development of unifacial leaves, we next observed the developmental patterns of unifacial leaf primordia of *J. prismatocarpus* under a scanning electron microscope. We also observed bifacial leaf development of rice as a comparison. In bifacial leaf development in rice, the leaf primordium arose as a small bulge on the flank of the SAM (Figure 3A). The leaf primordium then began to grow distally, enclosing the SAM (Figure 3B). During distal growth, development of adaxial and abaxial sides was coordinated, with the leaf apex being located at the junction of adaxial and abaxial domains (Figures 3C and 3D), which led to the formation of bifacial structures in both the leaf blade and the leaf sheath (Figure 3E). In the unifacial leaves of *J. prismatocarpus*, the leaf primordium first arose as a bulge on the flank of the SAM (Figure 3F), as in rice. However, the leaf primordium showed distinct developmental patterns soon after formation of the protrusion. During distal growth of *J. prismatocarpus* leaf primordia, it appeared that development of the abaxial domain was dominant (Figure 3G), and the leaf apex was located within the abaxial domain, while development of the adaxial domain was restricted to the basal region, covering the SAM (Figures 3H and 3I). As a result, the distal region of the unifacial leaf primordium, which will differentiate into the leaf blade, appeared to consist of only the abaxial identity (Figure 3J). Observations of longitudinal sections of *J. prismatocarpus* shoot apices also showed that the distal region of unifacial leaf primordia appeared to have only the abaxial identity, with the adaxial domain being confined to the basal region (see Supplemental Figure 3 online). To confirm these observations, we examined in situ localizations of Jp *PHB* and Jp *ARF3a* in longitudinal sections of *J. prismatocarpus* leaf primordia. In agreement with these observations, Jp *PHB* was indeed expressed adaxially only in the basal region (Figure 2K), whereas Jp *ARF3a* was expressed throughout the distal region and abaxially in the basal region (Figure 2L). These results indicate that the unifacial leaf blade is formed by abaxialization of the distal region of leaf primordia at a very early stage of development, rather than by postgenital fusion of adaxial leaf surfaces or leaf rotation.

Note that the internal region of the young leaf primordium is occupied by dividing cells (as in [G] and [J]). Air spaces in the mature leaf (as in [C]) are formed by subsequent cell death. Ad, adaxial domain; Bl, leaf blade; Sh, leaf sheath; Xy, presumptive xylem region in procambial strand. Bars = 1 cm in (A) and (B) and 200  $\mu$ m in (C) to (L).

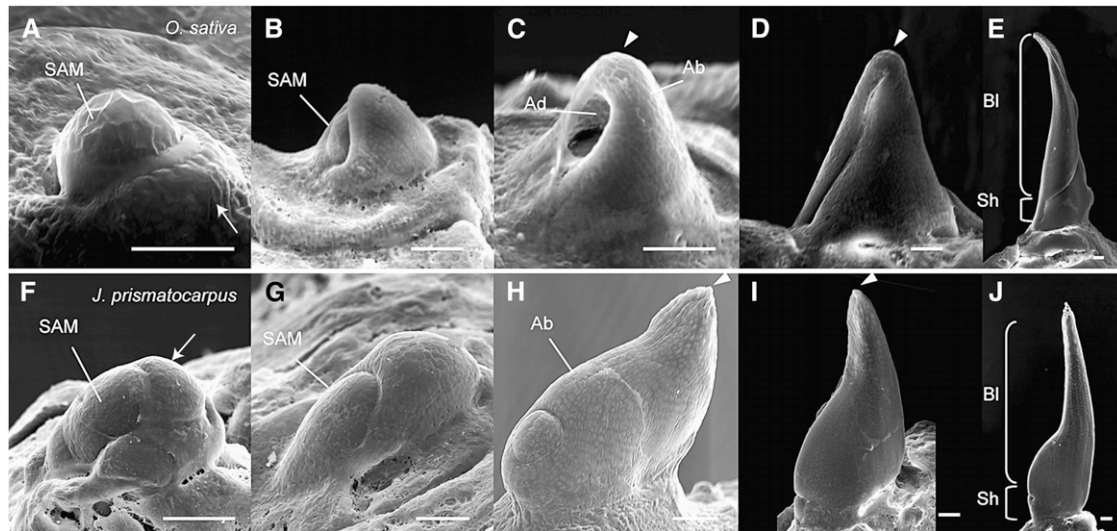

**Figure 3.** Development of Bifacial Leaves in Rice and Unifacial Leaves in *J. prismatocarpus*.

(A) to (E) Scanning electron micrographs of bifacial leaf development in rice. Leaf primordia development proceeds from (A) to (E).

(F) to (J) Scanning electron micrographs of unifacial leaf development in *J. prismatocarpus*. Leaf primordia development proceeds from (F) to (J).

Arrows indicate the incipient leaf primordium. Arrowheads indicate the leaf apex. Ad, adaxial domain; Ab, abaxial domain; Bl, leaf blade; Sh, leaf sheath. Bars = 50  $\mu$ m.

### Comparison of Unifacial Leaf Blade Development in *J. prismatocarpus* and *J. wallichianus*

We next studied the mechanism of leaf blade flattening in unifacial leaves by comparative analysis using *J. prismatocarpus* and *J. wallichianus*, which molecular phylogenetic analysis indicated are the most closely related species of the genus (see Supplemental Figure 4 and Supplemental Data Set 3 online). The leaf blade morphologies of these species differed transversely, with *J. wallichianus* developing cylindrical unifacial leaves (Figures 4A to 4D) and *J. prismatocarpus* developing flattened unifacial leaves (Figures 2A to 2D).

To understand the developmental mechanisms underlying flattened leaf blade formation in unifacial leaves, we first compared the development of leaf blades in the two species by making transverse sections of shoot apices. To classify stages of leaf development, we used the plastochron numbering system: plastochron1 (P1) represents the youngest primordium, P2 the next youngest, etc. (Itoh et al., 2005). In *J. prismatocarpus*, the leaf blade at the P1 stage was not so obviously flattened (Figure 4E) but was flattened at the P2 and P3 stages by directional outgrowth along the median plane (Figures 4F and 4G). By contrast, the leaf blade of *J. wallichianus* did not show such directional outgrowth and remained cylindrical throughout leaf development (Figures 4H to 4J). Thus, leaf blade flattening in unifacial leaves is regulated by mechanisms that promote directional laminar outgrowth along the median plane.

To further clarify the cell proliferation patterns during unifacial leaf development, we compared cell cycle activity during leaf development between *J. prismatocarpus* and *J. wallichianus* by examining in situ localization of *HistoneH4* mRNA, which is specifically expressed in the S phase of the cell cycle (Gaudin

et al., 2000). In *J. prismatocarpus*, we observed a concentration of *HistoneH4*-expressing cells on the SAM side of leaf blade primordia during P1 and P2 stages, when leaf primordia began and continued directional outgrowth toward the SAM side (Figures 5A, 5B, 5D, and 5E). After the P3 stage, *HistoneH4*-expressing cells were distributed uniformly throughout leaf primordia (Figures 5C and 5F). By contrast, we observed no obvious concentration of *HistoneH4*-expressing cells in cylindrical leaf primordia of *J. wallichianus* throughout leaf development (Figures 5G to 5L). These observations suggest that laminar outgrowth in *J. prismatocarpus* appears to be triggered by factors that promote cell proliferation of leaf primordia toward the SAM side at an early stage of development (P1 and P2 stages). Subsequently, directional laminar outgrowth in *J. prismatocarpus* may be maintained bidirectionally by more diffuse cell proliferation activity after the P3 stage.

### DL Is Strongly Expressed in Flattened Unifacial Leaf Primordia of *J. prismatocarpus*

To identify candidate genes responsible for the laminar outgrowth in unifacial leaves, we first attempted to identify differentially expressed genes in leaf primordia between *J. prismatocarpus* and *J. wallichianus* since genome information is not currently available for *Juncus*. We isolated homologs of known leaf developmental genes, such as *YABBY* (Bowman and Smyth, 1999; Sawa et al., 1999; Siegfried et al., 1999), *KANADI* (Eshed et al., 2001; Kerstetter et al., 2001), *HD-ZIPIII* (McConnell et al., 2001), *ARF3/ETT* (Pekker et al., 2005), *PRESSED FLOWER (PRS)* (Matsumoto and Okada, 2001), and *ASYMMETRIC LEAVES1/ROUGH SHEATH2/PHANTASTICA* (Waites et al., 1998; Timmermans et al., 1999; Tsiantis et al., 1999;

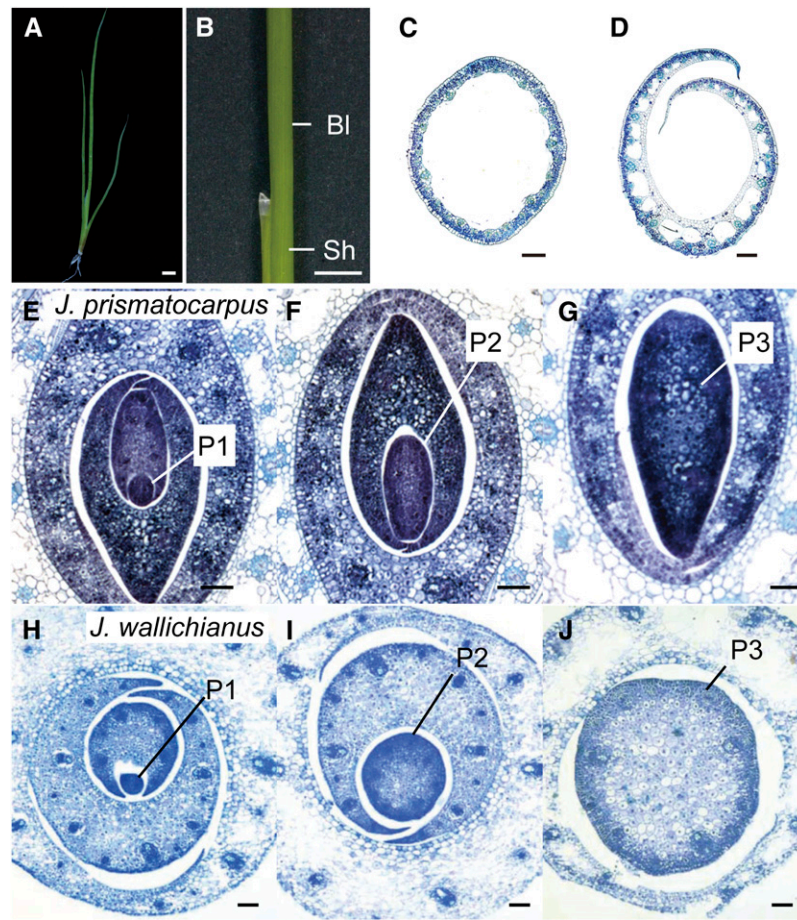

**Figure 4.** Differential Laminal Outgrowth in Unifacial Leaves of *J. prismatocarpus* and *J. wallichianus*.

(A) Seedling of *J. wallichianus* 4 weeks after germination.

(B) Lateral view of a leaf in *J. wallichianus*.

(C) and (D) Transverse sections of leaf blade (C) and leaf sheath (D) of *J. wallichianus*. Note that the internal air spaces are formed by cell death as in *J. prismatocarpus*, and the internal region of the young leaf primordium is occupied by dividing cells, as seen in (J).

(E) to (G) Transverse sections of shoot apices of *J. prismatocarpus* through P1 (E), P2 (F), and P3 (G) leaf blades showing directional laminar outgrowth along the median plane.

(H) to (J) Transverse sections of shoot apices of *J. wallichianus* through P1 (H), P2 (I), and P3 (J) leaf blades showing no directional laminar outgrowth. Plastochnron numbers of leaf blades are indicated (P1, P2, and P3). Bar in (A) and (B) = 1 cm; bar in (C) to (J) = 200  $\mu$ m.

Byrne et al., 2000), and studied their expression patterns. We identified two genes that had expression patterns that significantly differed between *J. prismatocarpus* and *J. wallichianus*. One is an ortholog of the *DL* gene, and the other is a homolog of the *PRS* gene.

*DL* is a member of the *YABBY* gene family (see Supplemental Figure 5A and Supplemental Data Set 4 online) and has a unique function in monocot bifacial leaves, such as those of rice (Yamaguchi et al., 2004; Ishikawa et al., 2009). In rice, *DL* is expressed at the center of leaves, where it regulates the formation of the leaf midrib, a rigid and thickened structure at the center of the leaf, through a function to promote cell proliferation of leaf primordia toward the SAM side (Yamaguchi et al., 2004). In *J. prismatocarpus*, a *DL* ortholog (*Jp DL*) was strongly expressed in the central domain of leaf primordia, extending from the central large vascular bundle to the leaf surface at the SAM side during

the P1 to P2 stages (Figures 6A to 6C and 6E). This is similar to the expression pattern of *DL* in rice leaves. The temporal pattern of *Jp DL* expression was correlated with the stage during which laminar outgrowth occurs. After the P3 stage, *DL* ceased to be expressed in mesophyll tissues and exhibited residual expression around the central large vascular bundle. At this stage, we found that *DL* expression also became detectable around the large vascular bundles located nearest to the secondary central domain of the flattened leaf blade (Figure 6D; discussed later). By contrast, in *J. wallichianus*, a *DL* ortholog (*Jw DL*) was only weakly expressed around the central large vascular bundle, and no expression was observed in proliferating mesophyll tissue throughout leaf development (Figures 6F to 6J). Therefore, expression patterns and levels of these *DL* orthologs correlated with the degree of laminar outgrowth. Given that rice *DL* plays a

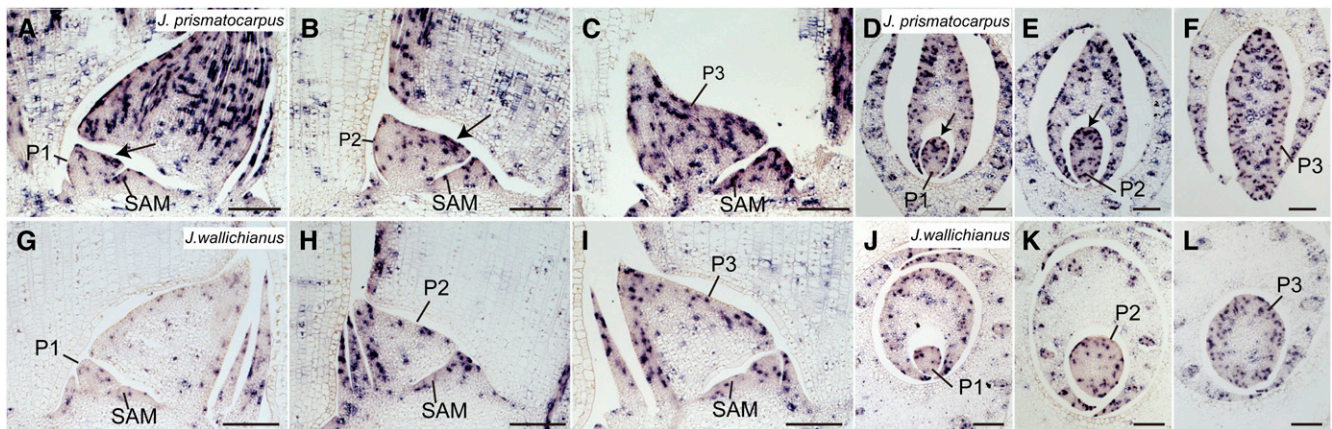

**Figure 5.** Cell Cycle Activity during Leaf Development in *J. prismatocarpus* and *J. wallichianus*.

(A) to (C) In situ localization of *HistoneH4* transcripts in median longitudinal sections of *J. prismatocarpus* shoot apices. Leaf primordia development proceeds from (A) to (C).

(D) to (F) In situ localization of *HistoneH4* transcripts in transverse sections through P1 (D), P2 (E), and P3 (F) leaf blades in *J. prismatocarpus*.

(G) to (I) In situ localization of *HistoneH4* transcripts in median longitudinal sections of *J. wallichianus* shoot apices. Leaf primordia development proceeds from (G) to (I).

(J) to (L) In situ localization of *HistoneH4* transcripts in transverse sections through P1 (J), P2 (K), and P3 (L) leaf blades in *J. wallichianus*.

Arrows in (A), (B), (D), and (E) indicate a concentration of *HistoneH4*-expressing cells at the SAM side of *J. prismatocarpus* leaf blades. Plastochron numbers of leaf blades are indicated (P1, P2, and P3). Bars = 200  $\mu\text{m}$ .

role in promoting cell proliferation of leaf primordia toward the SAM side, it is possible that leaf blade flattening in *J. prismatocarpus* is regulated by a similar *DL* function.

#### ***PRSa* Is Expressed Only in the Flattened Leaf Primordia**

*PRSa* is a member of the *WOX* (for *WUSCHEL* related homeobox) gene family (Haecker et al., 2004) and is necessary for the establishment of marginal domains in bifacial leaves via specific expression in leaf margins (Matsumoto and Okada, 2001; Vandebussche et al., 2009), with loss of function in maize resulting in a narrow leaf phenotype (Nardmann et al., 2004). Phylogenetic analysis revealed that, in Juncaceae and Poaceae, the *PRSa* genes consist of two subclasses, which we have designated *PRSa* and *PRSb* (see Supplemental Figure 6 and Supplemental Data Set 5 online). Expression patterns of *PRSa* were similar between *J. prismatocarpus* and *J. wallichianus*. In both species, *PRSa* was specifically expressed in the leaf margins of developing leaf sheaths but not in the unifacial leaf blade (Figures 7A to 7F). These results demonstrate that unifacial leaf blades do not differentiate a normal leaf margin identity, which further supports the abaxialization of unifacial leaf blades and indicates that *PRSa* is not involved in leaf blade flattening in unifacial leaves.

On the other hand, expression patterns of *PRSb* differed between the two species. In both species, *PRSb* was expressed in the presumptive leaf marginal domains before the initiation of leaf primordia (P0 stage; Figures 7G and 7J). In *J. prismatocarpus*, *PRSb* (*Jp PRSb*) expression was not initially observed in leaf primordia during the P1 to P2 stages (Figure 7H) but became detectable in the margin-like regions of flattened leaf blades at the P3 stage (Figure 7I). By contrast, expression of *J. wallichianus PRSb* (*Jw PRSb*) was not observed in the cylindrical leaf blades

throughout leaf development (Figures 7K and 7L). Thus, *PRSb* was expressed in margin-like regions in flattened leaf blades of *J. prismatocarpus* but not in cylindrical leaf blades of *J. wallichianus*. These results suggest that *PRSb* may also regulate the flattening of unifacial leaf blades by promoting marginal growth.

#### **Genetic Analysis of Leaf Blade Flatness Using Interspecific Hybrids**

To reveal whether *DL*, *PRSb*, or both are responsible for the differences in laminar outgrowth between *J. prismatocarpus* and *J. wallichianus*, we performed genetic analysis by generating the interspecific hybrids between the two species. We found that the two species could be hybridized and the F1 hybrids produced fertile seeds. We evaluated leaf flatness by calculating the ratio of leaf thickness to leaf width in transverse leaf sections (Figure 8A).

We first analyzed leaf flatness in the F1 and F2 generations of interspecific hybrids between *J. prismatocarpus* and *J. wallichianus* to understand the inheritance pattern of leaf flatness. In the F1 generation, leaf blades were somewhat flattened (Figure 8B; see Supplemental Table 1 online). In the F2 generation, the distribution of leaf flatness was broader and more continuous (Figure 8B; see Supplemental Table 1 online). These results indicate that the difference in leaf flatness between *J. prismatocarpus* and *J. wallichianus* is a polygenic trait and is regulated by at least two loci, including dominant or semidominant factors, which promote laminar outgrowth in *J. prismatocarpus*.

Next, we analyzed the genetic linkage between leaf flatness and *DL* or *PRSb* genotypes in 284 siblings of the F2 generation. We found that differences in the *DL* genotype corresponded with significant differences in leaf flatness (Figure 8C; see

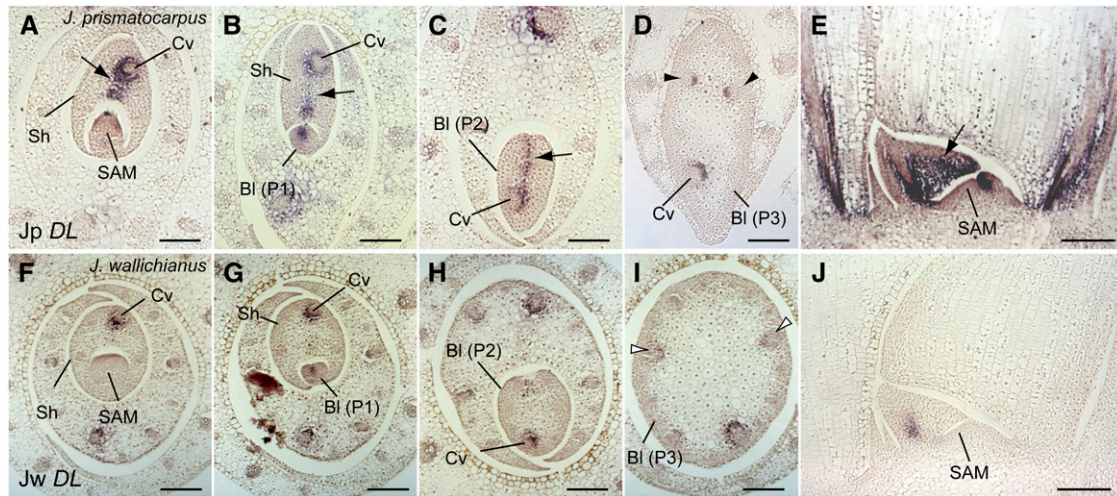

**Figure 6.** Expression Pattern of *DL* in Leaf Primordia of *J. prismatocarpus* and *J. wallichianus*.

(A) to (E) In situ localization of *Jp DL* transcripts in *J. prismatocarpus* shoot apices.

(A) to (C) Transverse sections of shoot apices through the SAM (A), a P1 leaf blade (B), and a P2 leaf blade (C), showing strong *Jp DL* expression in the central domain of leaf primordia (arrows).

(D) Transverse section through a P3 leaf blade, showing *Jp DL* expression in the secondary central domain (arrowheads).

(E) Longitudinal section through the SAM showing strong *Jp DL* expression (arrow).

(F) to (J) In situ localization of *Jw DL* transcripts in *J. wallichianus*.

(F) to (I) Transverse sections of shoot apices through the SAM (F), a P1 leaf blade (G), a P2 leaf blade (H), and a P3 leaf blade (I), showing no *Jw DL* expression in the mesophyll tissues and weak expression around the central vascular bundle. White arrowheads indicate loss of *Jw DL* expression in the secondary central domain.

(J) Longitudinal section through the SAM showing weak *Jw DL* expression.

BI, leaf blade; Sh, leaf sheath; Cv, central large vascular bundle. Plastochron numbers of leaf blades are indicated (P1, P2, and P3). Note that the central large vascular bundle differentiates in a slightly off-center position in *Juncus* leaves. Bars = 200  $\mu$ m.

Supplemental Table 1 online). Leaves were more flattened in homozygous *Jp DL* plants than in homozygous *Jw DL* plants. Leaf flatness was intermediate between these phenotypes when *DL* was heterozygous. On the other hand, leaf flatness in the F2 generation was not affected by the *PRSB* genotype (Figure 8D; see Supplemental Table 1 online). Combinations of each *DL* and *PRSB* genotype did not have synergistic effects on leaf flatness because differences in leaf flatness depended only on the *DL* genotypes (Figure 8E). These results indicate that the *DL* locus or a locus tightly linked to the *DL* locus is one of the loci responsible for the laminar outgrowth difference between the two species and that the allele at this locus of *J. prismatocarpus* works as a semidominant factor that promotes laminar outgrowth. On the other hand, *PRSB* is not directly involved in the difference in leaf flatness between *J. prismatocarpus* and *J. wallichianus*, with *Jp PRSB* and *Jw PRSB* possessing similar functions.

### Expression Analysis of the *DL* Locus

Genetic analysis indicated that the *DL* locus was a particularly intriguing candidate for flattened unifacial leaf blade formation and suggested that the activity of *DL* differed between the two species. As the putative *DL* protein amino acid sequences of the two species were identical (see Supplemental Figure 5B online), the differential *DL* activity was possibly the result of differential *DL* expression between the two species, as suggested by in situ

expression analysis (Figure 6). To confirm this speculation, we used real-time RT-PCR analysis to study the relationship between *DL* expression level and *DL* genotype in the F2 generation. We found that the total amounts of *DL* transcripts increased as the copy number of *Jp DL* increased (Figure 9A). These results indicate that the *Jp DL* locus expresses higher amounts of *DL* transcripts than the *Jw DL* locus in the F2 generation.

To further clarify if differential *DL* expression between the *Jp DL* and *Jw DL* loci was due to *cis*-regulatory changes at the *DL* locus, to differential *trans*-acting factors linked to the *DL* locus, or to differences in leaf shape, we next examined allele-specific *DL* expression levels in the F1 hybrid using a single nucleotide polymorphism located in the 3' untranslated region of *DL* cDNA (Figure 9B). In the F1 shoot, the *Jp DL* allele expressed higher amounts of *DL* transcripts than the *Jw DL* allele (Figure 9B). As the F1 hybrid contains both *Jp DL* and *Jw DL* alleles in an identical *trans*-acting environment and in an identical leaf shape background, this result indicates that differential *DL* expression is due to *cis*-regulatory changes in the *DL* locus itself and not to *trans*-acting factors or differences in leaf shape. In rice, *DL* is also expressed in developing carpel primordia, where it regulates carpel identity (Yamaguchi et al., 2004). In situ hybridization of *DL* in developing flowers of the two *Juncus* species revealed that *DL* orthologs were also expressed in carpel primordia both in *J. prismatocarpus* and in *J. wallichianus* at similar levels (see Supplemental Figure 7 online). Allele-specific expression

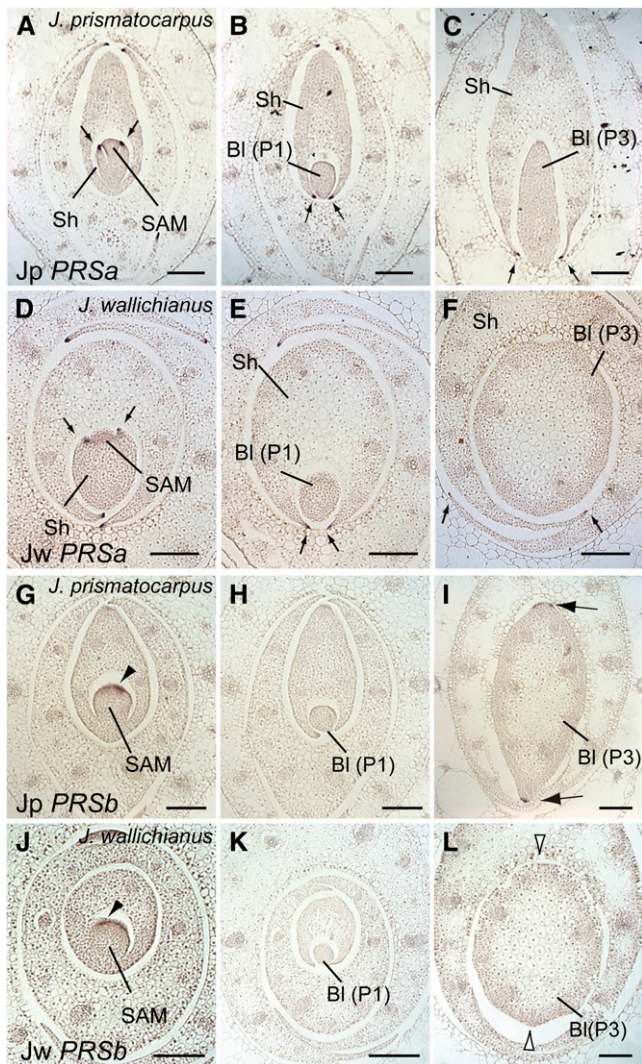

**Figure 7.** Expression Patterns of *PRSa* and *PRSb* in Leaf Primordia of *J. prismatocarpus* and *J. wallichianus*.

(A) to (C) In situ localization of *Jp PRSa* transcripts in transverse sections of *J. prismatocarpus* shoot apices.  
 (D) to (F) In situ localization of *Jw PRSa* transcripts in transverse sections of *J. wallichianus* shoot apices.  
 (A) and (D) Transverse sections through the SAM.  
 (B) and (E) Transverse sections through P1 leaf blades.  
 (C) and (F) Transverse sections through P3 leaf blades. Arrows in (A) to (F) indicate *PRSa* expression in leaf margins of the leaf sheath.  
 (G) to (I) In situ localization of *Jp PRSb* transcripts in transverse sections of *J. prismatocarpus* shoot apices.  
 (J) to (L) In situ localization of *Jw PRSb* transcripts in transverse sections of *J. wallichianus* shoot apices.  
 (G) and (J) Initial *PRSb* expression in presumptive leaf marginal domains (arrowheads).  
 (H) and (K) Loss of *PRSb* expression in leaf blades at the P1 stage.  
 (I) and (L) *PRSb* expression in P3 stage leaf blades in margin-like domains only in *J. prismatocarpus* (I), arrows), but not in *J. wallichianus* (L), white arrowheads).  
 BI, leaf blade; Sh, leaf sheath. Plastochron numbers of leaf blades are indicated in parenthesis. Bars = 200  $\mu$ m.

analysis in the F1 flower showed that almost the same amount of *DL* mRNA was expressed from both *DL* alleles (Figure 9B). Thus, differential *cis*-regulatory activity of *DL* between the two species was organ specific.

### Regulation of Leaf Central-Marginal Polarity Differentiation

During the P3 stage of leaf blade development in *J. prismatocarpus*, *DL* expression also became detectable around the large vascular bundles located nearest to the secondary central domain of the flattened leaf blade (Figure 6D). Based on this expression of *DL*, together with the expression of *PRSa* in the margin-like domains of the flattened unifacial leaf blade of *J. prismatocarpus* (Figure 7I), but not in the cylindrical leaf blade of *J. wallichianus* (Figure 7L), we assumed that central-marginal polarity was reorganized to follow the flattened leaf shape in the late stages of leaf development. To test this possibility, we isolated mutants of *J. prismatocarpus* with a radialized leaf blade phenotype (*radial leaf1*, *rad1*; *radial leaf5*, *rad5*; Figures 10A to 10C) and examined expression patterns of *DL* and *PRSa* in these mutants. As in the wild type, *DL* and *PRSa* were initially expressed in these mutants in the primary central domain (Figures 10D and 10F) and in the presumptive leaf marginal domain (Figures 10H and 10J), respectively. However, unlike the wild type, we did not observe the late expression of *DL* or *PRSa* in the secondary central and marginal domains in these mutants (Figures 10E, 10G, 10I, and 10K). As we found no obvious mutation in the *DL* and *PRSa* loci of these mutants, loss of expression of these genes in the later stages of mutant leaf development is probably not caused by defects in *cis*-regulation or mRNA stability. Thus, these observations indicate that leaf blade flattening induces *DL* and *PRSa* expression in the secondary central and marginal domains, respectively, and suggest that central-marginal polarity can differentiate somewhat autonomously via a leaf flatness-dependent mechanism. Considering also our linkage analysis results, we further suggest that the loss of *PRSa* expression in the leaf blades of *J. wallichianus* results from the loss of blade flattening in this species and not from differential *PRSa* promoter activity.

### DISCUSSION

We investigated the genetic mechanisms underlying flattened leaf blade formation in unifacial leaves. Based on the results, we propose the following model of laminar outgrowth in unifacial leaves (Figure 11). Developmentally, the default shape of the unifacial leaf blade is cylindrical, as in *J. wallichianus*, because of abaxialization (Figure 11A, i). However, in monocots, *DL* functions to thicken leaf primordia by promoting cell proliferation toward the shoot apex. Such *DL* function in unifacial leaves may lead to flattened leaf blade formation, as in *J. prismatocarpus* (Figure 11A, ii), while in monocot bifacial leaves it leads to leaf midrib formation (Figure 11B). Flattening of the unifacial leaf blade then triggers the differentiation of a gradient of central-marginal polarity corresponding to the flattened leaf shape (Figure 11A, iii), which induces *DL* and *PRSa* expression in the secondary central and marginal domains, respectively (Figure



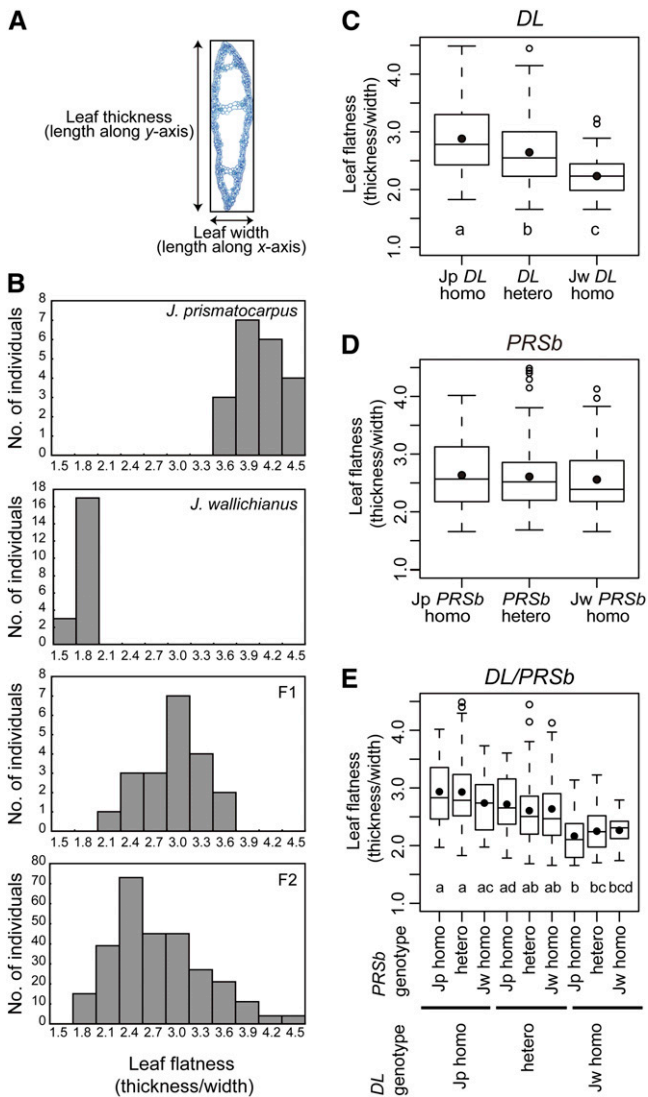

**Figure 8.** Genetic Analysis of Leaf Flatness Using Interspecific Hybrids between *J. prismatocarpus* and *J. wallichianus*.

**(A)** Schematic of leaf flatness analysis. The ratio of leaf thickness to leaf width was calculated to evaluate leaf flatness, with a larger value indicating a more flattened leaf.

**(B)** Histograms showing leaf flatness distribution in each generation. Generations are indicated at the top right.

**(C) to (E)** Box plots showing differences in leaf flatness in 284 siblings of the F2 generation, depending on *DL* **(C)** or *PRSb* **(D)** genotypes, and in all combinations of the *DL* and *PRSb* genotypes **(E)**. Each box encloses 50% of the distribution, with the horizontal line marking the median and the dot marking the mean. The lines extending from each box indicate the minimum and maximum values that fall within 1.5 times the height of the box. Open circles indicate outliers. Genotypes are indicated beneath the plots. Sample numbers are shown in Supplemental Table 1 online. Different letters (i.e., a to d) below the columns in **(C)** and **(E)** indicate significant differences between genotypes. One-way ANOVA and Tukey's HSD test ( $\alpha = 0.05$ , with Bonferroni correction) were used for multiple comparisons.

[See online article for color version of this figure.]

11A, iv). The developmental and evolutionary mechanisms of leaf blade flattening in unifacial leaves are discussed below.

### Unifacial Leaf Blades Are Abaxialized at the Gene Expression Level

In the leaf blade of *J. prismatocarpus*, *ARF3a* is expressed throughout the outer region of the leaf blade, while *PHB* is only expressed in the presumptive xylem region. These results demonstrate that the unifacial leaf blade is abaxialized at the gene expression level. Loss of *PRSa* expression in the leaf blade also

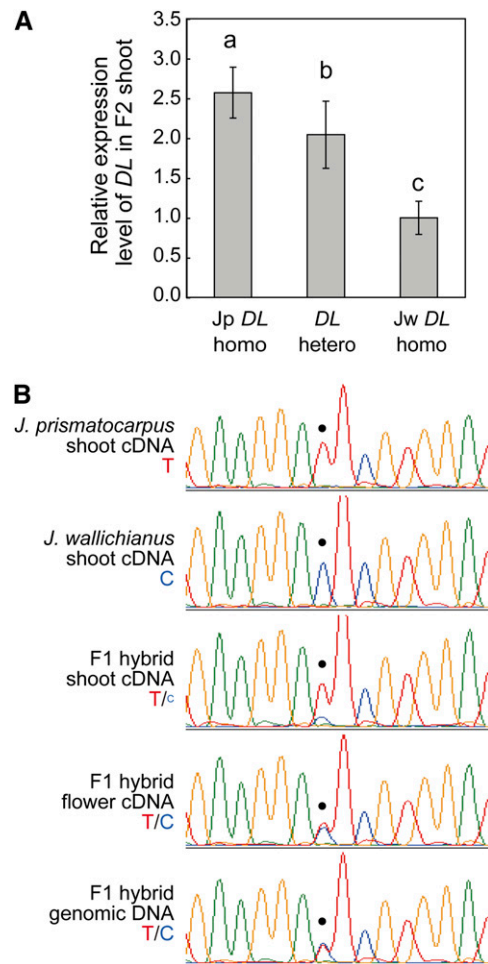

**Figure 9.** Expression Level of *DL* Depends on the *DL* Genotype in the Interspecific Hybrid.

**(A)** Quantitative real-time RT-PCR analysis of *DL* transcripts in the interspecific hybrid F2 generation of each *DL* genotype. Data (mean  $\pm$  SD) are presented as relative expression units after normalization to a *TUBULIN* gene ( $n = 12$ ). Different letters (i.e., a to c) above the columns indicate significant variations between the genotypes based on one-way ANOVA and Tukey's HSD test ( $\alpha = 0.05$ , with Bonferroni correction).

**(B)** Chromatograms of sequenced RT-PCR products, showing allelic *DL* expression in the interspecific hybrid F1 generation. Templates are indicated on the left. The dot indicates the position of a T (red) or C (blue) single nucleotide polymorphism between Jp *DL* and Jw *DL*.

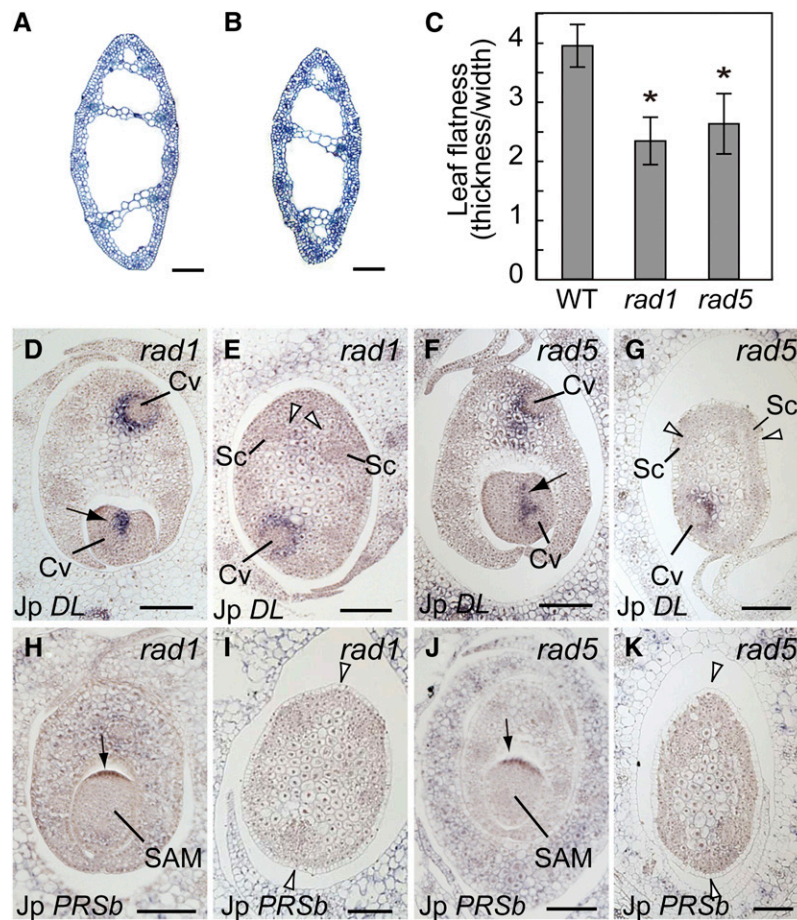

**Figure 10.** *DL* and *PRSb* Expression in the Radialized Leaf Blades of *J. prismatocarpus rad1* and *rad5* Mutants.

(A) and (B) Transverse sections of *rad1* (A) and *rad5* (B) leaf blades showing the radialized leaf blade phenotype.

(C) Leaf flatness in the wild type, *rad1*, and *rad5*. Data are mean  $\pm$  SD. Wild type,  $n = 20$ , mean =  $3.95 \pm 0.36$ ; *rad1*,  $n = 12$ , mean =  $2.34 \pm 0.40$ ; *rad5*,  $n = 12$ , mean =  $2.63 \pm 0.5$ . Asterisks indicate significant difference compared with the wild type ( $P < 0.05$ , *t* test).

(D) to (G) In situ localization of *Jp DL* transcripts in transverse sections of *rad1* (D) and (E) and *rad5* (F) and (G) shoot apices at an early (D) and (F) and late (E) and (G) developmental stage of leaf primordia. Arrows in (D) and (F) show initial *Jp DL* expression in the primary central domain. Arrowheads in (E) and (G) show loss of *Jp DL* expression in the secondary central domain.

(H) to (K) In situ localization of *Jp PRSb* transcripts in transverse sections of *rad1* (H) and (I) and *rad5* (J) and (K) shoot apices at an early (H) and (J) and late (I) and (K) developmental stage of leaf primordia. Arrows in (H) and (J) show initial *Jp PRSb* expression in the presumptive leaf marginal domain. Arrowheads in (I) and (K) show loss of *Jp PRSb* expression at a later stage of leaf development.

Cv, central large vascular bundle; Sc, large vascular bundle in the secondary central domain. Bars = 200  $\mu$ m.

supports the abaxialization of the unifacial leaf blade because *PRSa* is expressed at the junction of adaxial and abaxial identities in the leaf sheath. Observations of developmental patterns of unifacial leaf primordia, together with in situ expression analysis, have shown that the distal region of the unifacial leaf primordia is abaxialized from a very early stage, which leads to the formation of abaxialized leaf blades. The abaxialization effect seems to be somewhat incomplete, as the basal sheath region acquires adaxial-abaxial polarity in unifacial leaves, indicating that the distal region of monocot leaves may be more sensitive to the abaxialization effect than the basal region. In maize, the *milkweed pod1* mutant, a loss-of-function mutant of a *KANADI* homolog, shows adaxialization only in the leaf sheath (Candela

et al., 2008), which supports the notion of differential sensitivity to adaxial-abaxial polarity defects between the leaf blade and the leaf sheath in monocots.

It has been suggested that alterations to adaxial-abaxial patterning mechanisms could be major driving forces in modifying leaf forms (Kim et al., 2003; Gleissberg et al., 2005; Johnston et al., 2010). The unifacial leaf is one of the most interesting examples in which alterations in leaf adaxial-abaxial polarity have given rise to a novel leaf form. Identification of genes responsible for unifacial leaf development is essential for a better understanding of the developmental and evolutionary mechanisms underlying unifacial leaf blade formation. The establishment of adaxial-abaxial polarity is regulated by several

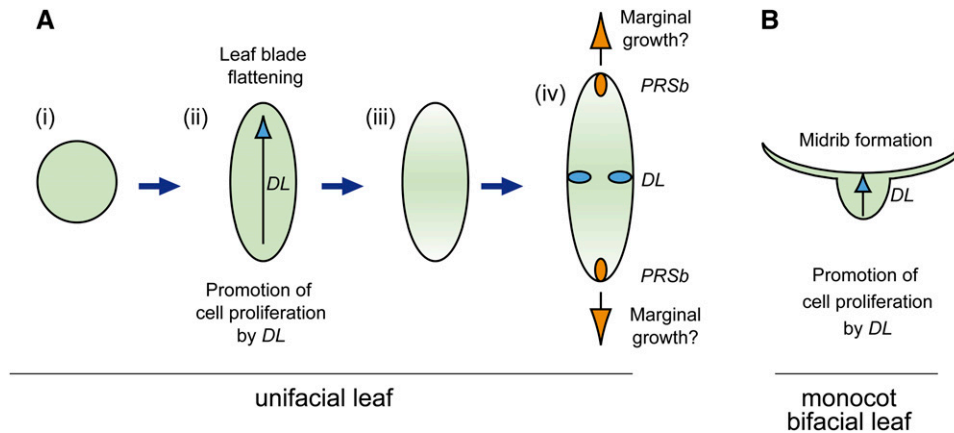

**Figure 11.** Genetic Framework of Flattened Leaf Blade Formation in Unifacial Leaves.

**(A)** Model of laminar outgrowth and autonomous differentiation of central-marginal polarity in flattened unifacial leaves. (i) Cylindrical leaf blade as a result of abaxialization. (ii) Leaf blade flattening through *DL* function. (iii) Differentiation of gradient of central-marginal polarity to follow the flattened leaf shape. (iv) Induction of *DL* and *PRsB* expression in the secondary central and marginal domains, respectively.

**(B)** *DL* function in monocot bifacial leaves.

Blue arrows indicate the *DL* function to promote cell proliferation of leaf primordia toward the SAM side. Orange arrows indicate a putative *PRsB* function to promote marginal growth in flattened unifacial leaves.

distinct families of transcription factors and small regulatory RNAs (Husbands et al., 2009). It is possible that a genetic change or changes in one or more of these regulators may have resulted in unifacial leaf development. Further functional studies of each regulator are expected to reveal the genetic mechanisms of leaf blade abaxialization in unifacial leaves.

#### ***DL* May Promote Flattened Leaf Blade Formation in *J. prismatocarpus***

Observations of developmental patterns of leaf blades in *J. prismatocarpus* and *J. wallichianus* have demonstrated that leaf blade flattening in unifacial leaves is promoted by directional laminar outgrowth along the median plane of the leaf primordia. At the cellular level, the directional laminar outgrowth appears to be initially triggered by active cell proliferation on the SAM side of the leaf blade, as demonstrated by a concentration of *HistoneH4*-expressing cells in *J. prismatocarpus* leaf primordia. Subsequently, laminar outgrowth may be bidirectionally maintained by more diffuse cell proliferation activity. A similar observation has been reported in another flattened unifacial-leaved species, *Acorus calamus*, where unifacial leaf blade flattening is initially mediated by adaxial (i.e., SAM side) meristematic activity and then bidirectionally proceeds by more diffuse meristematic activity (Kaplan, 1970). Therefore, leaf blade flattening of unifacial leaves, which probably has a conserved mechanism among monocots, could be dissected into two developmental processes: active cell proliferation at the SAM side of leaf primordia at an early stage of development and more diffuse cell proliferation during later stages.

We identified the *DL* ortholog as a candidate responsible for leaf blade flattening in *J. prismatocarpus*. Expression levels and patterns of *DL* correlate with the degree of laminar outgrowth in

*J. prismatocarpus* and *J. wallichianus*. Genetic analysis using interspecific hybrids demonstrates that the chromosome region containing the *DL* locus from *J. prismatocarpus* flattens the unifacial leaf blade. Although further examinations are required to finely map the locus, expression analysis demonstrates that the expression activities of *DL* differ between the two species, probably due to *cis*-regulatory changes at the *DL* locus itself, rather than differences in *trans*-acting factors of *DL*. These results suggest that *DL* is one of the genetic factors that promote laminar outgrowth in *J. prismatocarpus*. During unifacial leaf blade flattening, *DL* is probably involved in active cell proliferation on the SAM side of leaf primordia at an early stage of leaf development because strong *DL* expression is observed during the P1 and P2 stages and *DL* has a similar function in rice in promoting cell proliferation in the leaf primordia toward the SAM side. Functional studies, such as those involving the generation of near-isogenic lines carrying the *Jp DL* allele in a *J. wallichianus* background and vice versa, or the isolation of loss- and/or gain-of-function *DL* lines by mutation or transgenic approaches, would further reveal the exact role of *DL* in unifacial leaf development.

Genetic analysis indicated that factors other than *DL* are also involved in the differential laminar outgrowth observed between *J. prismatocarpus* and *J. wallichianus*. Such factors may interact with *DL* at an early stage or regulate more diffuse cell proliferation activity during the later stages of leaf development. Identifying such factors by quantitative trait locus mapping using interspecific hybrids and by isolating the causative genes for the *rad* mutants in *J. prismatocarpus* would further clarify the genetic mechanisms underlying leaf blade flattening in unifacial leaves.

Identification of *cis*-regulatory differences at the DNA sequence level in the *DL* locus of the two *Juncus* species would further deepen our understanding of the mechanisms that

regulate *DL* expression. As flattened unifacial leaves are widespread in monocots from the earliest divergent extant family, Acoraceae, to specialized families, such as Iridaceae and Juncaceae (Rudall and Buzgo, 2002; Yamaguchi and Tsukaya, 2010), and expression patterns of *DL* are similar between bifacial leaves of rice and flattened unifacial leaves of *J. prismatocarpus*, it is likely that expression activity in leaf primordia is reduced in *J. wallichianus*. Interestingly, the differential *cis*-regulatory activity of *DL* is organ specific: Jp *DL* and Jw *DL* alleles express almost the same amount of *DL* transcripts in carpels of the interspecific hybrid F1 generation. It has been suggested that organ-specific *cis*-regulatory changes of multifunctional genes may provide a mechanism for generating morphological diversity, while preserving their roles in other developmental processes (Carroll, 2000; Shapiro et al., 2004; Prud'homme et al., 2006). In the evolution of unifacial leaves, *DL* expression may have been modified multiple times to generate diversity in transverse forms of unifacial leaf blades. Thus, it will be of great interest to identify the actual sequences of the *cis*-regulatory elements of *DL*, so as to examine their roles in the evolution of flattened and radialized unifacial leaves.

### Regulation of Central-Marginal Leaf Polarity Differentiation

The mechanisms that regulate the specification of central-marginal leaf polarity are largely unknown even in model species because of a lack of useful mutants. For example, it remains unknown whether specification of central-marginal polarity formation requires positional cues regarding the relationship to the SAM. It is also unclear whether specification of leaf margin identity requires positional information from the junction of leaf adaxial-abaxial domains, where leaf margins generally develop in bifacial leaves. In this study, we have shown that leaf blade flattening is a key that triggers *DL* and *PRSB* expression in the secondary central and marginal domains of the flattened leaf blade, respectively. This finding indicates that central-marginal leaf polarity can somewhat autonomously differentiate depending on the flattened leaf shape without information from a source outside of the leaf, such as the SAM. In addition, specification of leaf margin identity could be partly independent of adaxial-abaxial polarity, although positional information from the junction of adaxial-abaxial polarity is necessary for *PRSA* expression and probably for rigid specification of leaf margin identity. We propose that once the leaf blade is flattened, a gradient of central-marginal polarity is formed by an as yet unidentified factor, which is distributed in a symmetrical pattern in the flattened leaf blade. The plant hormone auxin is known to act as a gradient signal in multiple contexts throughout plant development (De Smet and Jurgens, 2007; Bowman and Floyd, 2008). During *Arabidopsis* leaf development, auxin is symmetrically distributed on either side of the midvein (Reinhardt et al., 2003; Zgurski et al., 2005) and is therefore a potential candidate for this unidentified molecule. Thus, it will be of great interest to study the distribution of auxin in unifacial leaves and to determine its relationship with central-marginal polarity differentiation.

The functions of *DL* and *PRSB* in the secondary central and marginal domains are also of interest. Morphological differentiation of the secondary central-marginal polarity is often observed

in flattened unifacial leaves, although it is not clearly evident in *J. prismatocarpus*. Some flattened unifacial-leaved species, such as *A. calamus* or *Iris ensata*, develop a clear secondary midrib in the central domain of the flattened leaf blade, and margin-like tissues often differentiate at both tips of the flattened blade (Kaplan, 1970; Yamaguchi and Tsukaya, 2010). In these species, *DL* and *PRSB* homologs may regulate the formation of the secondary midrib and margin-like tissues, respectively. It is also possible that *PRSB* expression in margin-like regions promotes flattening of unifacial leaf blades by promoting marginal growth, although *PRSB* is not directly involved in the difference in leaf flatness between *J. prismatocarpus* and *J. wallichianus*. Loss of *PRSB* expression in *J. wallichianus* is probably a secondary effect due to a lack of leaf blade flattening in this species, and Jw *PRSB* would possess a cryptic function equivalent to that of Jp *PRSB*, as indicated by genetic analysis. Isolation of *PRSB* mutants from *J. prismatocarpus* would help to reveal the role of this gene during flattened unifacial leaf development.

### Evolution of Leaf Flattening in Unifacial Leaves

Although the independent evolution of similar morphological traits is widespread, the underlying mechanisms are not fully understood (Gould, 2002; West-Eberhard, 2003; Yoon and Baum, 2004). Flattened leaves have independently evolved in bifacial and unifacial leaves, probably for efficient light capture. Our research demonstrates that flattening of leaf blades in unifacial leaves is promoted by *DL* function, which plays a distinct phenotypic role in bifacial leaves, namely, in leaf midrib formation. However, *DL* seems to play a similar function at the cellular level both in the bifacial and unifacial leaf development to promote cell proliferation of leaf primordia toward the shoot apex. Such *DL* function may have been easily co-opted to make abaxialized leaf blades flatten during the evolution of unifacial leaves. Thus, a preexisting gene function can be recruited to play a distinct phenotypic role in organisms with different body plans, without changing the gene's cellular function, and such recruitment can give rise to convergence of similar morphological traits.

Unifacial leaves have repeatedly evolved in monocots (Rudall and Buzgo, 2002; Yamaguchi and Tsukaya, 2010), indicating the existence of backgrounds that allow unifacial leaf development in monocots. Since *DL* orthologs function in leaf development in monocots alone (Bowman and Smyth, 1999; Yamaguchi et al., 2004; Fourquin et al., 2005; Ishikawa et al., 2009; Wang et al., 2009), monocot leaves may possess the unique ability to become flattened by escaping from a developmental constraint to be radialized, even when they are abaxialized. Thus, the specific function of *DL* in leaf development in monocots may account for one genetic background that has allowed the repeated evolution of unifacial leaves in monocots.

## METHODS

### Plant Materials and Growth Conditions

*Juncus prismatocarpus* subsp. *leschenaultii* Kirschner and *Juncus wallichianus* Laharpe were collected from wild populations in Okazaki, Japan. Herbarium specimens were verified by Futoshi Miyamoto at Tokyo

University of Agriculture, Japan. At least six generations of each species were self-pollinated before use. Seeds of both species were cold-treated for 1 week at 4°C and germinated on agar plates containing Murashige and Skoog salts. Seedlings were grown in soil under a 16-h-light/8-h-dark cycle at 22°C. For mutagenesis, seeds of *J. prismatocarpus* were treated with 0.3% ethyl methanesulfonate for 14 h at room temperature. Approximately 5000 M2 plants were screened.

### RNA Extractions and Degenerate PCR

Total RNA was isolated from 4-week-old seedlings of *J. prismatocarpus* and *J. wallichianus* using Plant RNA Isolation Reagent (Invitrogen), with subsequent treatment with DNaseI (Invitrogen). Total RNA (1 µg) was used for first-strand cDNA synthesis using the SuperScript III first-strand synthesis system (Invitrogen), and 0.5 µL of this reaction was used as the template for PCR amplification. Degenerate primers were designed using the CODEHOP program (Rose et al., 2003). Amplified DNA fragments were gel-extracted and cloned into pCRII-TOPO (Invitrogen), and at least 16 clones per fragment were sequenced. Primer sequences are listed in Supplemental Table 2 online.

### 5' and 3' Rapid Amplification of cDNA Ends

To determine 5' and 3' sequences of homologous genes, 5' and 3' rapid amplification of cDNA ends was performed. cDNA was generated using a GeneRacer kit (Invitrogen) according to the manufacturer's protocol, using 2 µg of total RNA per reaction. Amplified products were cloned into pCRII-TOPO (Invitrogen), and at least eight clones per fragment were sequenced. Full-length cDNAs were reamplified by RT-PCR. Primer sequences are listed in Supplemental Table 2 online.

### In Situ Hybridization

Shoot apices and inflorescences were fixed in 3% paraformaldehyde and 0.25% glutaraldehyde in 0.1 M sodium phosphate buffer for ~16 h at 4°C. Tissue was then dehydrated in a graded ethanol series, replaced with xylene, and embedded in Paraplast Plus (Oxford Labware). Hybridization was performed as previously described (Yamaguchi et al., 2004) on 9-µm paraffin sections. A portion of the cDNA sequences were amplified by RT-PCR, cloned into pCRII-TOPO (Invitrogen), and used to generate sense and antisense probes. Primer sequences are listed in Supplemental Table 2 online. In all cases, sense probes produced no signal.

### Real-Time PCR

Total RNA was isolated from lateral branches that produced four visible leaves using Plant RNA Isolation Reagent, with subsequent treatment with DNaseI. Accumulation levels of *DL* transcripts were analyzed using a 7500 Real-Time PCR system (Applied Biosystems) by monitoring amplification with SYBR Premix Ex Taq II (Takara), as described in the manufacturer's protocol. All data are presented as relative expression units after normalization to a *TUBULIN* gene. All data were reproduced in two or more additional independent experiments.

### Analysis of Leaf Flatness

The middle portions of leaf blades that were formed at the final vegetative nodes were sampled after maturation, and cross sections were made by hand. Images of sections were taken and boxes enclosing the transverse planes were drawn on digital images. Leaf thickness (length along *y* axis) and width (length along *x* axis) were measured using Image J software (<http://rsbweb.nih.gov/ij/>). The ratio of leaf thickness to leaf width was calculated to evaluate leaf flatness. One-way analysis of variance (ANOVA) and the Tukey's HSD test ( $\alpha = 0.05$ , with Bonferroni correction) were used for multiple comparisons.

### Genotyping Interspecific Hybrids

Genomic DNA from the *DL* and *PRSB* loci were amplified using PCR, then treated with the restriction enzymes *Nru*I and *Nae*I, respectively, and separated by agarose gel electrophoresis. Primer sequences are listed in Supplemental Table 2 online.

### Allele-Specific *DL* Expression

Total RNA was isolated from lateral branches that produced four visible leaves and young inflorescences (5 mm in length) of interspecific F1 hybrids using Plant RNA Isolation Reagent, with subsequent treatment with DNaseI. Total RNA (1 µg) was used for first-strand cDNA synthesis using the SuperScript III first-strand synthesis system, and 0.5 µL of this reaction was used as the template for PCR amplification. A portion of *DL* cDNA was amplified by 20 cycles of PCR and then purified and sequenced directly. The genomic DNA of the F1 hybrid was used as a control. Primer sequences are listed in Supplemental Table 2 online.

### Phylogenetic Analysis

The amino acid sequences of HD-ZIPIII, ARF3/ARF4, YABBY, and WOX proteins were first aligned by ClustalW and readjusted manually. The phylogenetic trees were generated using MEGA4 (Tamura et al., 2007) by the neighbor-joining method (Saitou and Nei, 1987) with 1000 iterations of bootstrap analysis. For phylogenetic analysis of *Juncus* species, the nuclear ribosomal DNA internal transcribed spacer (ITS) region sequences were aligned by ClustalW and readjusted manually. Maximum likelihood and maximum parsimony analyses were performed using PAUP\* version 4.0b10 (Swofford, 2002) as described by Roalson (2005). Sequences used to generate the phylogeny are presented in Supplemental Data Sets 1 to 5 online. Accession numbers used in the phylogenetic analyses are shown in Supplemental Table 3 online.

### Accession Numbers

Sequence data from this article can be found in the GenBank/EMBL data libraries under the following accession numbers: AB539879 (Jp *PHB*), AB539877 (Jp *ARF3a*), AB539878 (Jp *DL*), AB539882 (Jw *DL*), AB539880 (Jp *PRSa*), AB539881 (Jp *PRSB*), AB539883 (Jw *PRSa*), AB539884 (Jw *PRSB*), and AB540127 (Jw ITS).

### Author Contributions

T.Y. conceived the project, designed the study, performed the experiments, and wrote the article. S.Y. performed statistical analysis. H.T. designed and directed the study and wrote the article.

### Supplemental Data

The following materials are available in the online version of this article.

**Supplemental Figure 1.** Phylogenetic Tree of HD-ZIPIII Proteins.

**Supplemental Figure 2.** Phylogenetic Tree of ARF3/ARF4 Proteins.

**Supplemental Figure 3.** Serial Longitudinal Sections of *J. prismatocarpus* Shoot Apices.

**Supplemental Figure 4.** Simplified Phylogenetic Tree of *Juncus* Showing the Relationship between *J. prismatocarpus* and *J. wallichianus*.

**Supplemental Figure 5.** Phylogeny of YABBY Family Proteins and Putative Amino Acid Sequences of *J. prismatocarpus* and *J. wallichianus* DL Proteins.

**Supplemental Figure 6.** Phylogenetic Tree of WOX Proteins.

**Supplemental Figure 7.** In Situ Localization of *DL* Transcripts in Carpel Primordia of *J. prismatocarpus* and *J. wallichianus*.

**Supplemental Table 1.** Leaf Flatness in Parental Lines and the F1 and F2 Generation of Interspecific Hybrids.

**Supplemental Table 2.** Primers Used in This Study.

**Supplemental Table 3.** Accession Numbers Used in Our Phylogenetic Analyses.

**Supplemental Data Set 1.** Sequences Used to Generate the Phylogenetic Tree of HD-ZIPIII Proteins Presented in Supplemental Figure 1.

**Supplemental Data Set 2.** Sequences Used to Generate the Phylogenetic Tree of ARF3/ARF4 Proteins Presented in Supplemental Figure 2.

**Supplemental Data Set 3.** Sequences Used to Generate the Phylogenetic Tree of *Juncus* Presented in Supplemental Figure 4.

**Supplemental Data Set 4.** Sequences Used to Generate the Phylogenetic Tree of YABBY Family Proteins Presented in Supplemental Figure 5A.

**Supplemental Data Set 5.** Sequences Used to Generate the Phylogenetic Tree of WOX Proteins Presented in Supplemental Figure 6.

## ACKNOWLEDGMENTS

We thank M. Futoshi for verifying the species used in this study and for helpful comments. We thank C. Yamaguchi, M. Nagura, T. Kadowaki, A. Irie, and A. Goto for technical assistance. This work was supported by a Grant-in-Aid for Creative Scientific Research to H.T. from the Japan Society for the Promotion of Science, a Grant-in-Aid for Scientific Research on Priority Areas to H.T., and a Grant-in-Aid for Young Scientists (B) to T.Y. from the Ministry of Education, Culture, Sports, Science, and Technology of Japan, as well as a grant from the Sumitomo Foundation to T.Y.

Received May 26, 2010; revised June 25, 2010; accepted July 6, 2010; published July 20, 2010.

## REFERENCES

- Bowman, J.L., and Floyd, S.K.** (2008). Patterning and polarity in seed plant shoots. *Annu. Rev. Plant Biol.* **59**: 67–88.
- Bowman, J.L., and Smyth, D.R.** (1999). *CRABS CLAW*, a gene that regulates carpel and nectary development in *Arabidopsis*, encodes a novel protein with zinc finger and helix-loop-helix domains. *Development* **126**: 2387–2396.
- Byrne, M.E., Barley, R., Curtis, M., Arroyo, J.M., Dunham, M., Hudson, A., and Martienssen, R.A.** (2000). *Asymmetric leaves1* mediates leaf patterning and stem cell function in *Arabidopsis*. *Nature* **408**: 967–971.
- Candela, H., Johnston, R., Gerhold, A., Foster, T., and Hake, S.** (2008). The *milkweed pod1* gene encodes a KANADI protein that is required for abaxial/adaxial patterning in maize leaves. *Plant Cell* **20**: 2073–2087.
- Carroll, S.B.** (2000). Endless forms: The evolution of gene regulation and morphological diversity. *Cell* **101**: 577–580.
- Cutler, D.** (1969). Anatomy of the Monocotyledons. IV. Juncales. (Oxford, UK: Clarendon).
- De Smet, I., and Jurgens, G.** (2007). Patterning the axis in plants—Auxin in control. *Curr. Opin. Genet. Dev.* **17**: 337–343.
- Eshed, Y., Baum, S.F., Perea, J.V., and Bowman, J.L.** (2001). Establishment of polarity in lateral organs of plants. *Curr. Biol.* **11**: 1251–1260.
- Fourquin, C., Vinauger-Douard, M., Fogliani, B., Dumas, C., and Scutt, C.P.** (2005). Evidence that *CRABS CLAW* and *TOUSLED* have conserved their roles in carpel development since the ancestor of the extant angiosperms. *Proc. Natl. Acad. Sci. USA* **102**: 4649–4654.
- Gaudin, V., Lunness, P.A., Fobert, P.R., Towers, M., Riou-Khamlichi, C., Murray, J.A.H., Coen, E., and Doonan, J.H.** (2000). The expression of *D-Cyclin* genes defines distinct developmental zones in snapdragon apical meristems and is locally regulated by the *Cycloidea* gene. *Plant Physiol.* **122**: 1137–1148.
- Gleissberg, S., Groot, E.P., Schmalz, M., Eichert, M., Kolsch, A., and Hutter, S.** (2005). Developmental events leading to peltate leaf structure in *Tropaeolum majus* (Tropaeolaceae) are associated with expression domain changes of a YABBY gene. *Dev. Genes Evol.* **215**: 313–319.
- Gould, S.J.** (2002). *The Structure of Evolutionary Biology*. (Cambridge, MA: Belknap).
- Haecker, A., Gross-Hardt, R., Geiges, B., Sarkar, A., Breuninger, H., Herrmann, M., and Laux, T.** (2004). Expression dynamics of *WOX* genes mark cell fate decisions during early embryonic patterning in *Arabidopsis thaliana*. *Development* **131**: 657–668.
- Husbands, A.Y., Chitwood, D.H., Plavskin, Y., and Timmermans, M.C.** (2009). Signals and prepatterns: New insights into organ polarity in plants. *Genes Dev.* **23**: 1986–1997.
- Ishikawa, M., Ohmori, Y., Tanaka, W., Hirabayashi, C., Murai, K., Ogihara, Y., Yamaguchi, T., and Hirano, H.Y.** (2009). The spatial expression patterns of *DROOPING LEAF* orthologs suggest a conserved function in grasses. *Genes Genet. Syst.* **84**: 137–146.
- Itoh, J., Nonomura, K., Ikeda, K., Yamaki, S., Inukai, Y., Yamagishi, H., Kitano, H., and Nagato, Y.** (2005). Rice plant development: From zygote to spikelet. *Plant Cell Physiol.* **46**: 23–47.
- Itoh, J.I., Hibara, K.I., Sato, Y., and Nagato, Y.** (2008b). Developmental role and auxin responsiveness of *class III homeodomain leucine zipper* gene family members in rice. *Plant Physiol.* **147**: 1960–1975.
- Itoh, J.I., Sato, Y., and Nagato, Y.** (2008a). *The SHOOT ORGANIZATION2* gene coordinates leaf domain development along the central-marginal axis in rice. *Plant Cell Physiol.* **49**: 1226–1236.
- Johnston, R., Candela, H., Hake, S., and Foster, T.** (2010). The maize *milkweed pod1* mutant reveals a mechanism to modify organ morphology. *Genesis*, in press.
- Juarez, M.T., Kui, J.S., Thomas, J., Heller, B.A., and Timmermans, M.C.** (2004). MicroRNA-mediated repression of *rolled leaf1* specifies maize leaf polarity. *Nature* **428**: 84–88.
- Kaplan, D.R.** (1970). Comparative foliar histogenesis in *Acorus calamus* and its bearing on the phyllode theory of monocotyledonous leaves. *Am. J. Bot.* **57**: 331–361.
- Kaplan, D.R.** (1973). The problem of leaf morphology and evolution in the monocotyledons. *Q. Rev. Biol.* **48**: 437–457.
- Kaplan, D.R.** (1975). Comparative developmental evaluation of the morphology of unifacial leaves in the monocotyledons. *Bot. Jahrb. Syst. Pflanzenges. Pflanzengeogr.* **95**: 1–105.
- Kerstetter, R.A., Bollman, K., Taylor, R.A., Bombles, K., and Poethig, R.S.** (2001). *KANADI* regulates organ polarity in *Arabidopsis*. *Nature* **411**: 706–709.
- Kim, M., McCormick, S., Timmermans, M., and Sinha, N.** (2003). The expression domain of *PHANTASTICA* determines leaflet placement in compound leaves. *Nature* **424**: 438–443.
- Kirschner, J.** (2002a). *Juncaceae 2: Juncus* subg. *Juncus*, Species Plantarum: Flora of the World, Part 7. (Canberra, Australia: ABRIS).
- Kirschner, J.** (2002b). *Juncaceae 3: Juncus* subg. *Agathryon*, Species Plantarum: Flora of the World, Part 8. (Canberra, Australia: ABRIS).

- Matsumoto, N., and Okada, K.** (2001). A homeobox gene, *PRESSED FLOWER*, regulates lateral axis-dependent development of *Arabidopsis* flowers. *Genes Dev.* **15**: 3355–3364.
- McConnell, J.R., Emery, J., Eshed, Y., Bao, N., Bowman, J., and Barton, M.K.** (2001). Role of *PHABULOSA* and *PHAVOLUTA* in determining radial patterning in shoots. *Nature* **411**: 709–713.
- Nardmann, J., Ji, J., Werr, W., and Scanlon, M.J.** (2004). The maize duplicate genes *narrow sheath1* and *narrow sheath2* encode a conserved homeobox gene function in a lateral domain of shoot apical meristems. *Development* **131**: 2827–2839.
- Pekker, I., Alvarez, J.P., and Eshed, Y.** (2005). Auxin response factors mediate *Arabidopsis* organ asymmetry via modulation of KANADI activity. *Plant Cell* **17**: 2899–2910.
- Piazza, P., Jasinski, S., and Tsiantis, M.** (2005). Evolution of leaf developmental mechanisms. *New Phytol.* **167**: 693–710.
- Prud'homme, B., Gompel, N., Rokas, A., Kassner, V.A., Williams, T.M., Yeh, S.D., True, J.R., and Carroll, S.B.** (2006). Repeated morphological evolution through cis-regulatory changes in a pleiotropic gene. *Nature* **440**: 1050–1053.
- Reinhardt, D., Pesce, E.R., Stieger, P., Mandel, T., Baltensperger, K., Bennett, M., Traas, J., Friml, J., and Kuhlemeier, C.** (2003). Regulation of phyllotaxis by polar auxin transport. *Nature* **426**: 255–260.
- Roalson, E.H.** (2005). Phylogenetic relationships in the Juncaceae inferred from nuclear ribosomal DNA internal transcribed spacer sequence data. *Int. J. Plant Sci.* **166**: 397–413.
- Rose, T.M., Henikoff, J.G., and Henikoff, S.** (2003). CODEHOP (COnsensus-DEgenerate Hybrid Oligonucleotide Primer) PCR primer design. *Nucleic Acids Res.* **31**: 3763–3766.
- Rudall, P.J., and Buzgo, M.** (2002). Evolutionary history of the monocot leaf. In *Developmental Genetics and Plant Evolution*, Q.C.B. Cronk, R.M. Bateman, and J.A. Hawkins, eds (London: Taylor & Francis), pp. 431–458.
- Saitou, N., and Nei, M.** (1987). The neighbor-joining method: A new method for reconstructing phylogenetic trees. *Mol. Biol. Evol.* **4**: 406–425.
- Sawa, S., Watanabe, K., Goto, K., Liu, Y.G., Shibata, D., Kanaya, E., Morita, E.H., and Okada, K.** (1999). *FILAMENTOUS FLOWER*, a meristem and organ identity gene of *Arabidopsis*, encodes a protein with a zinc finger and HMG-related domains. *Genes Dev.* **13**: 1079–1088.
- Shapiro, M.D., Marks, M.E., Peichel, C.L., Blackman, B.K., Nereng, K.S., Jonsson, B., Schluter, D., and Kingsley, D.M.** (2004). Genetic and developmental basis of evolutionary pelvic reduction in three-spine sticklebacks. *Nature* **428**: 717–723.
- Siegfried, K.R., Eshed, Y., Baum, S.F., Otsuga, D., Drews, G.N., and Bowman, J.L.** (1999). Members of the *YABBY* gene family specify abaxial cell fate in *Arabidopsis*. *Development* **126**: 4117–4128.
- Steeves, T.A., and Sussex, I.M.** (1989). *Patterns in Plant Development*. (Cambridge, UK: Cambridge University Press).
- Swofford, D.L.** (2002). PAUP\*. *Phylogenetic Analysis Using Parsimony* (\*and Other Methods), Version 4.0b10. (Sunderland, MA: Sinauer Associates).
- Tamura, K., Dudley, J., Nei, M., and Kumar, S.** (2007). MEGA4: Molecular Evolutionary Genetics Analysis (MEGA) software version 4.0. *Mol. Biol. Evol.* **24**: 1596–1599.
- Timmermans, M.C., Hudson, A., Becraft, P.W., and Nelson, T.** (1999). ROUGH SHEATH2: A Myb protein that represses *knox* homeobox genes in maize lateral organ primordia. *Science* **284**: 151–153.
- Tsiantis, M., Schneeberger, R., Golz, J.F., Freeling, M., and Langdale, J.A.** (1999). The maize *rough sheath2* gene and leaf development programs in monocot and dicot plants. *Science* **284**: 154–156.
- Vandenbussche, M., Horstman, A., Zethof, J., Koes, R., Rijpkema, A.S., and Gerats, T.** (2009). Differential recruitment of *WOX* transcription factors for lateral development and organ fusion in petunia and *Arabidopsis*. *Plant Cell* **21**: 2269–2283.
- Waites, R., and Hudson, A.** (1995). *phantastica*: A gene required for dorsoventrality of leaves in *Antirrhinum majus*. *Development* **121**: 2143–2154.
- Waites, R., Selvadurai, H.R., Oliver, I.R., and Hudson, A.** (1998). The *PHANTASTICA* gene encodes a MYB transcription factor involved in growth and dorsoventrality of lateral organs in *Antirrhinum*. *Cell* **93**: 779–789.
- Wang, A., Tang, J., Li, D., Chen, C., Zhao, X., and Zhu, L.** (2009). Isolation and functional analysis of *LiYAB1*, a *YABBY* family gene, from lily (*Lilium longiflorum*). *J. Plant Physiol.* **166**: 988–995.
- West-Eberhard, M.J.** (2003). *Developmental Plasticity and Evolution*. (Oxford, UK: Oxford University Press).
- Yamaguchi, T., Nagasawa, N., Kawasaki, S., Matsuoka, M., Nagato, Y., and Hirano, H.Y.** (2004). The *YABBY* gene *DROOPING LEAF* regulates carpel specification and midrib development in *Oryza sativa*. *Plant Cell* **16**: 500–509.
- Yamaguchi, T., and Tsukaya, H.** (2010). Evolutionary and developmental studies of unifacial leaves in monocots: *Juncus* as a model system. *J. Plant Res.* **123**: 35–41.
- Yoon, H.S., and Baum, D.A.** (2004). Transgenic study of parallelism in plant morphological evolution. *Proc. Natl. Acad. Sci. USA* **101**: 6524–6529.
- Zgurski, J.M., Sharma, R., Bolokoski, D.A., and Schultz, E.A.** (2005). Asymmetric auxin response precedes asymmetric growth and differentiation of *asymmetric leaf1* and *asymmetric leaf2* *Arabidopsis* leaves. *Plant Cell* **17**: 77–91.
- Zhang, G.H., Xu, Q., Zhu, X.D., Qian, Q., and Xue, H.W.** (2009). *SHALLOT-LIKE1* is a *KANADI* transcription factor that modulates rice leaf rolling by regulating leaf abaxial cell development. *Plant Cell* **21**: 719–735.
